# Supplementary material for: Biodegradable Zn-ion battery with a lignin composite electrode and bio-ionic liquid based electrolyte: possible in situ energy generation by lignin electrocatalysis
Source: Royal Society of Chemistry journal article supplement (doi:10.1039/d0ma00954g), 2021-01-01
Supplement: d0ma00954g1.pdf [file d0ma00954g1.pdf]

## Supporting Information

### Biodegradable Zn-Ion Battery with lignin composite electrode and Bio-Ionic Liquid Based Electrolyte: Possible In Situ Energy Generation by Lignin Electrocatalysis

Abhishek Lahiri<sup>1,2</sup>\*, Li Yang<sup>1</sup>, Oliver Hoeffft<sup>1</sup>, Frank Endres<sup>1\*</sup>

<sup>1</sup>Institute of Electrochemistry, Clausthal University of Technology, Arnold-Sommerfeld-Str. 6,  
38678 Clausthal-Zellerfeld, Germany

<sup>2</sup>Department of Chemical Engineering, Brunel University London, London UB8 3PH, UK

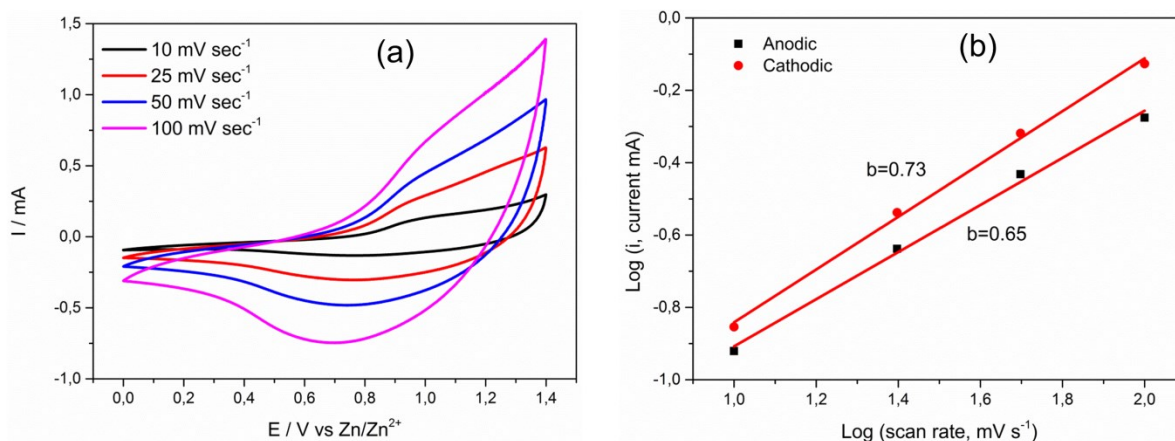

Figure S1: (a) CV cycles at different scan rates of PPy/lignin in 1 mol/kg ZnAc<sub>2</sub> in (50 wt% ChAc + 50 wt% water) (b) Relationship between log i and log v plots for the cathodic and anodic sweeps of CV

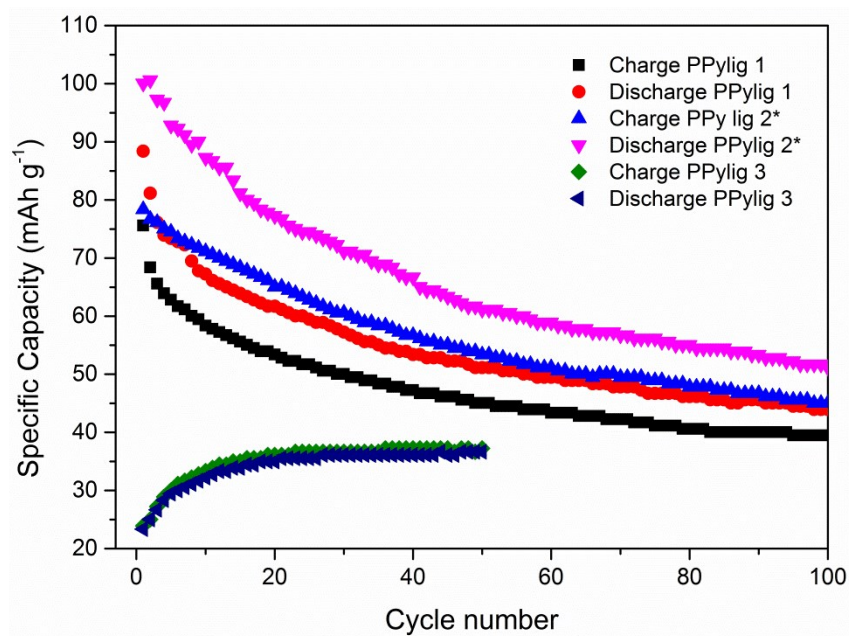

Figure S2: Galvaostatic charge-discharge curves of PPy lig 1, PPy lig 2\* and PPy lig 3 at 200 mA g<sup>-1</sup> in 1 mol/kg ZnAc<sub>2</sub> in (50 wt% ChAc + 50 wt% water)

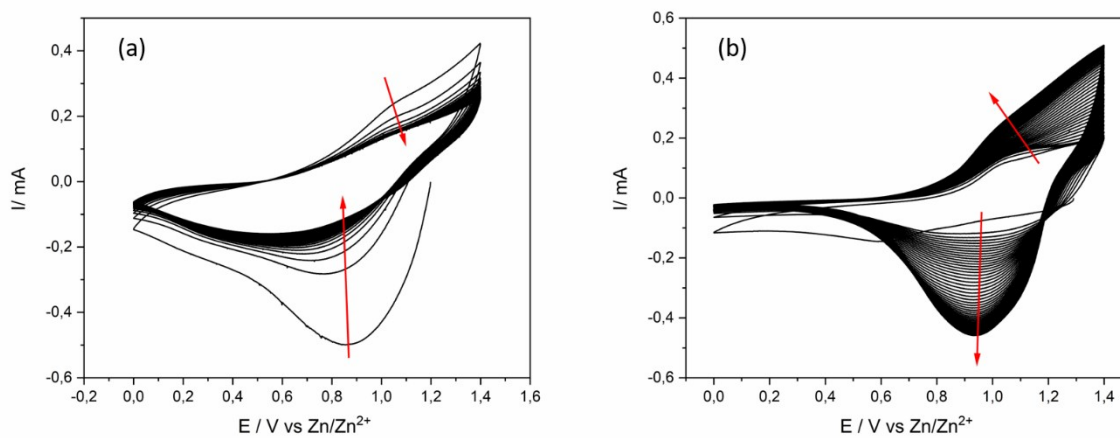

Figure S3 (a) 50 CV cycles of PPy, (b) 50 CV cycles of PPy lig in 50 wt% ChAc+ 50 wt% water

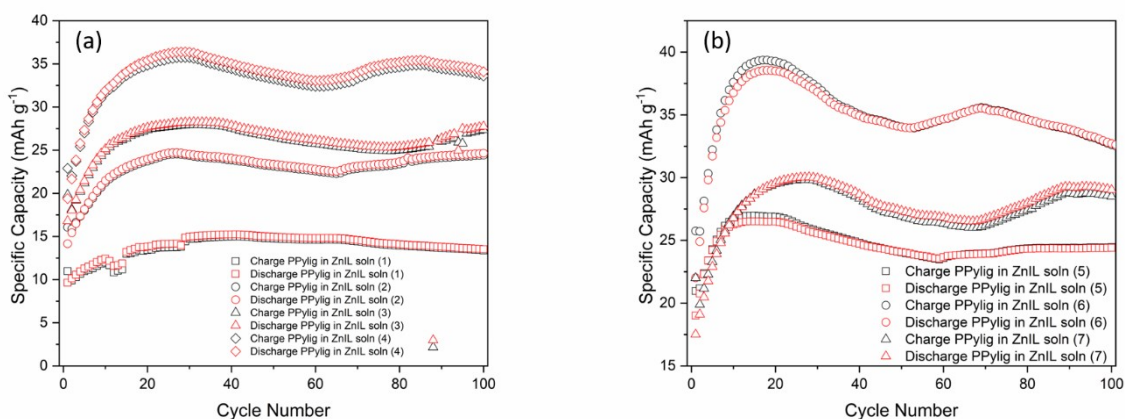

Figure S4 (a, b) Repeated charge-discharge curves of PPyIig 2 at at  $200 \text{ mA g}^{-1}$  in  $1 \text{ mol/kg ZnAc}_2$  in (50 wt% ChAc + 50 wt% water)

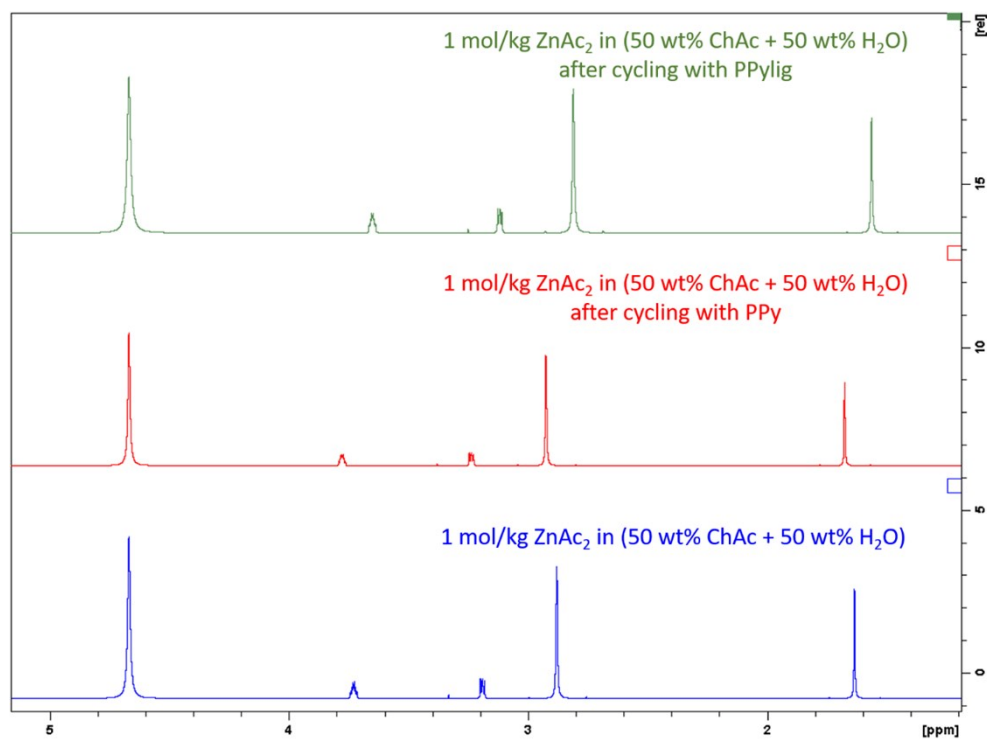

Figure S5: Comparison of  $^1\text{H-NMR}$  spectra of  $1 \text{ mol/kg ZnAc}_2$  in (50 wt% ChAc + 50 wt% water) before and after cycling with PPy and PPy/lignin

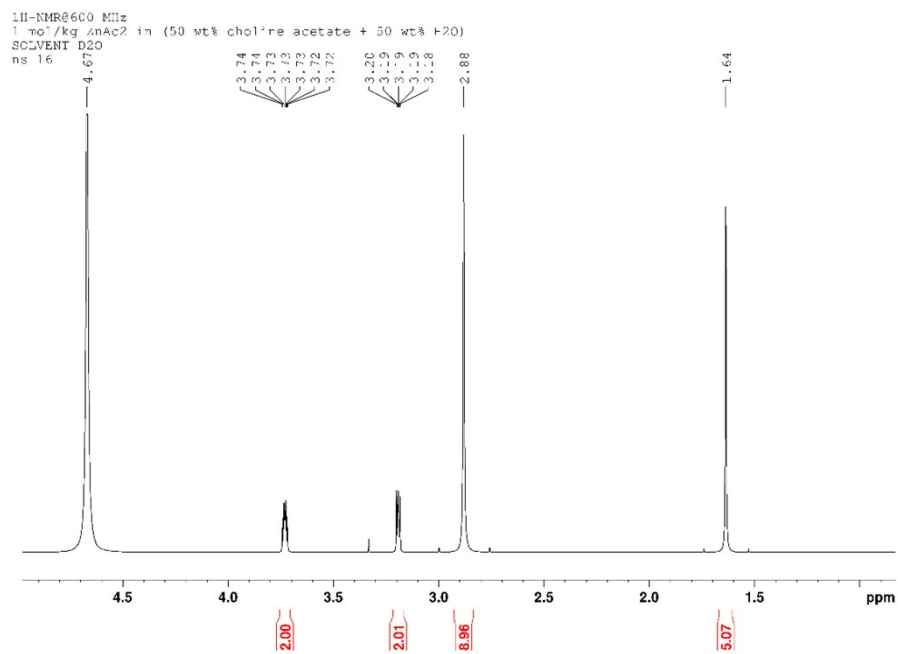

Figure S6: Detailed <sup>1</sup>H-NMR of 1 mol/kg ZnAc<sub>2</sub> in (50 wt% ChAc + 50 wt% water)

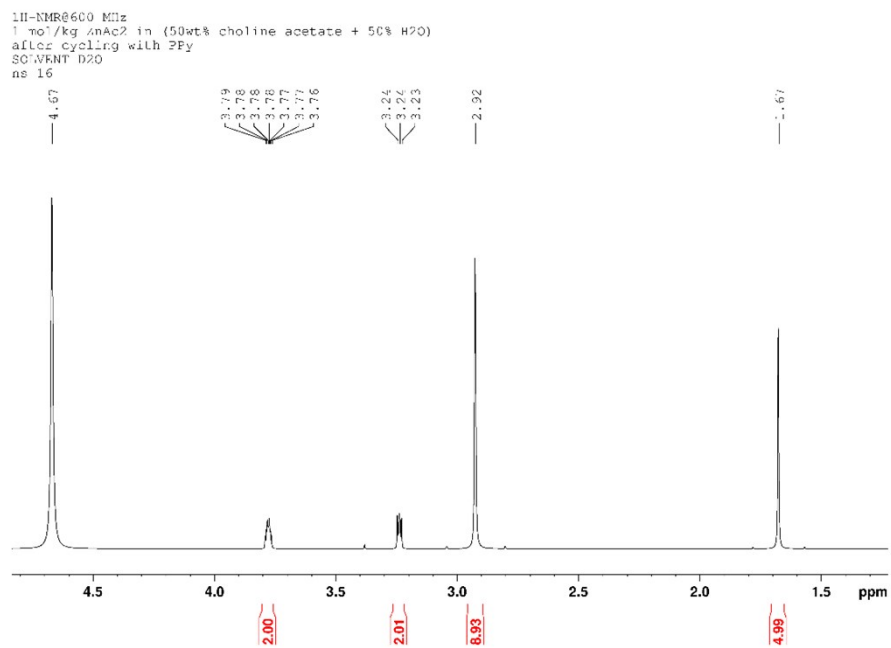

Figure S7: Detailed <sup>1</sup>H-NMR of 1 mol/kg ZnAc<sub>2</sub> in (50 wt% ChAc + 50 wt% water) after cycling with PPy

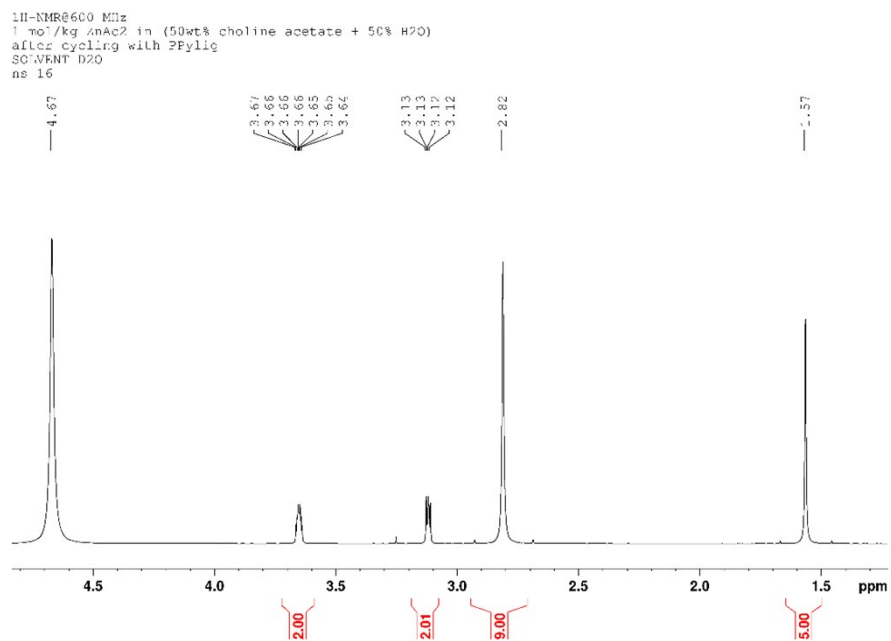

Figure S8: Detailed <sup>1</sup>H-NMR of 1 mol/kg ZnAc<sub>2</sub> in (50 wt% ChAc + 50 wt% water) after cycling with PPy/lignin

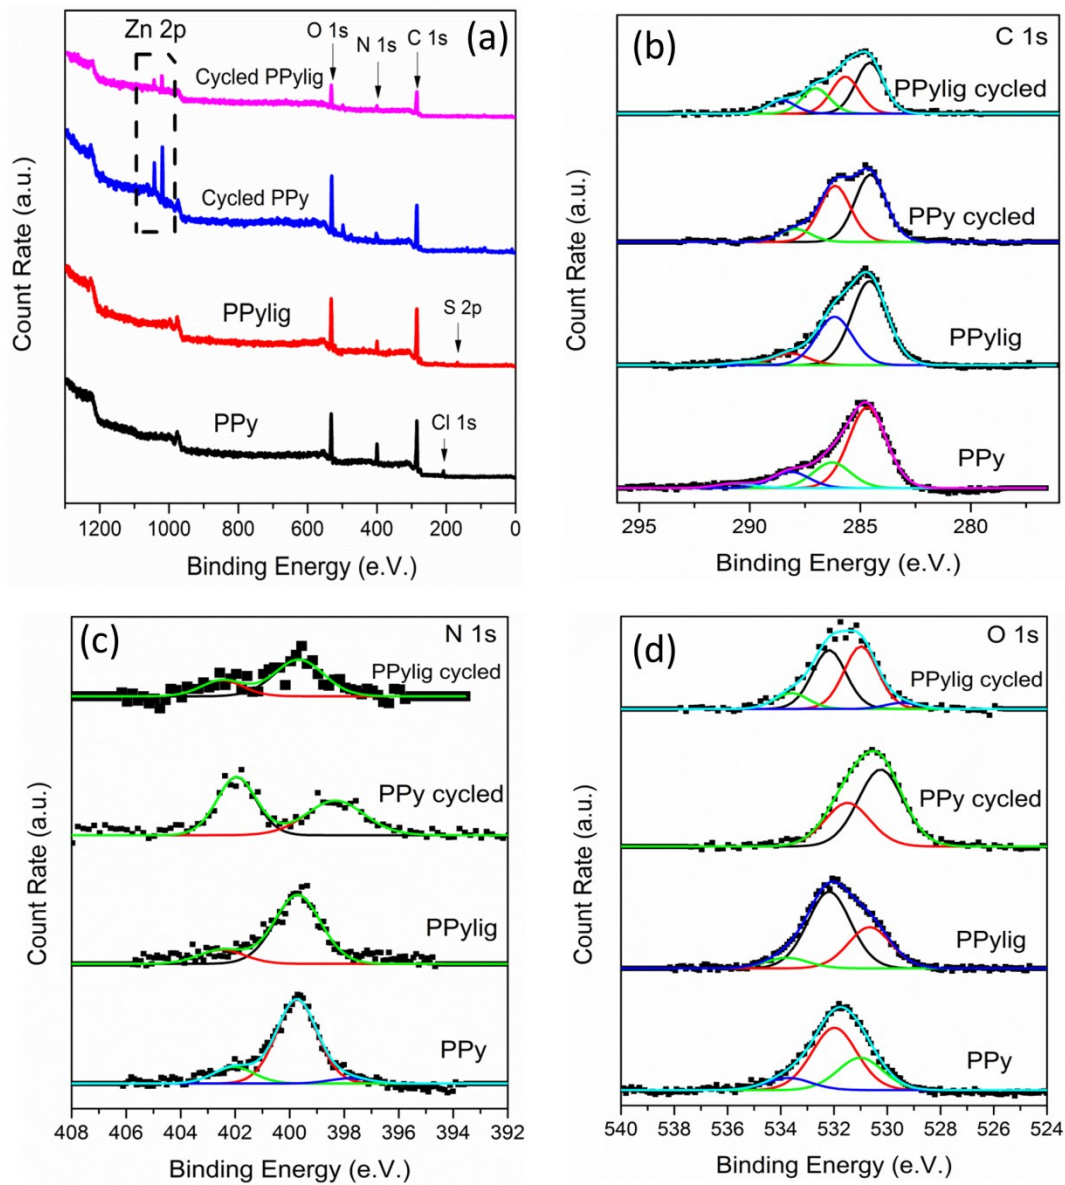

Figure S9: (a) Survey spectra (b) C 1s spectra (c) N 1s spectra (d) O 1s spectra of PPY and PPY/lignin before and after cycling in Zn-ion battery

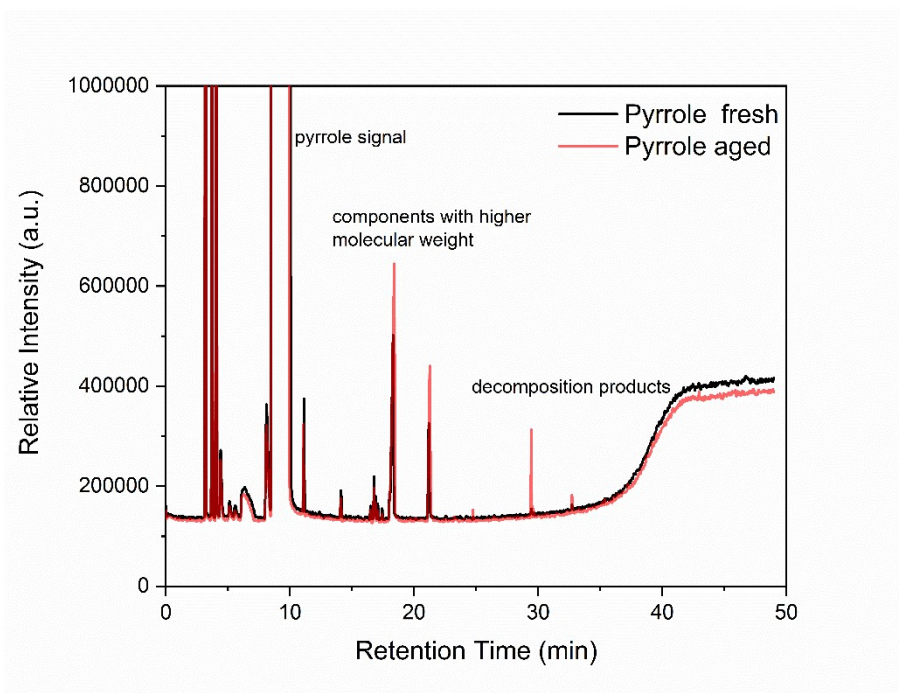

Figure S10: GCMS of freshly distilled pyrrole and pyrrole aged for 3 weeks in a refrigerator

## Nomenclature

PPy: Polypyrrole

PPy<sub>lig</sub> 1: Polypyrrole/lignin composite made from 0.1 M pyrrole + 0.05 M LiClO<sub>4</sub> + 0.5 mg/mL of lignosulfonate in the electrolyte

PPy<sub>lig</sub> 2: Polypyrrole/lignin composite made from 0.1 M pyrrole + 0.05 M LiClO<sub>4</sub> + 2.5 mg/mL of lignosulfonate in the electrolyte

PPy<sub>lig</sub> 2\*: Polypyrrole/lignin composite made from 0.1 M pyrrole + 0.05 M LiClO<sub>4</sub> + 3.75 mg/mL of lignosulfonate in the electrolyte

PPy<sub>lig</sub> 3: Polypyrrole/lignin composite made from 0.1 M pyrrole + 0.05 M LiClO<sub>4</sub> + 5 mg/mL of lignosulfonate in the electrolyte
